# Supplementary material
Source: publisher figshare collection journal article supplement (https://gsajournals.figshare.com/ndownloader/files/30723365)
Supplement: Supplementary file 1 [file 30723365]

LOCUS       pBphi_kniproxmin_p1ext 13526 bp ds-DNA     circular     18-MAR-2021
DEFINITION  .
ACCESSION   urn.local...1376422232321.8 (modified)                             
VERSION     urn.local...1376422232321.8                                        
FEATURES             Location/Qualifiers
     enhancer        292..950
                     /label="kni_prox_minimal_minus_enhancer"
                     /ApEinfo_revcolor=#ffef86
                     /ApEinfo_fwdcolor=#ffef86
     promoter        951..1106
                     /label="kni_promoter1_extended"
                     /ApEinfo_revcolor=#faac61
                     /ApEinfo_fwdcolor=#faac61
     misc_feature    1107..2408
                     /label="StableMS2Repeats"
                     /ApEinfo_revcolor=#84b0dc
                     /ApEinfo_fwdcolor=#84b0dc
     misc_feature    1108..2408
                     /label="ATCCC"
                     /ApEinfo_revcolor=#d59687
                     /ApEinfo_fwdcolor=#d59687
     exon            2409..3148
                     /label="YellowExon1"
                     /ApEinfo_revcolor=#b7e6d7
                     /ApEinfo_fwdcolor=#b7e6d7
     intron          3149..5846
                     /label="YellowIntron"
                     /ApEinfo_revcolor=#b7e6d7
                     /ApEinfo_fwdcolor=#b7e6d7
     intron          5847..6737
                     /label="YellowExon2"
                     /ApEinfo_revcolor=#c7b0e3
                     /ApEinfo_fwdcolor=#c7b0e3
     3'UTR           6738..7550
                     /label="SV40 A-tubulin end"
                     /ApEinfo_revcolor=#ff9ccd
                     /ApEinfo_fwdcolor=#ff9ccd
     CDS             8522..11099
                     /label="mini-white"
                     /ApEinfo_revcolor=#75c6a9
                     /ApEinfo_fwdcolor=#75c6a9
     gene            join(12712..13526,1..43)
                     /label="Ampicillin"
                     /ApEinfo_revcolor=#b4abac
                     /ApEinfo_fwdcolor=#b4abac
ORIGIN
        1 caaaaaaggg aataagggcg acacggaaat gttgaatact catactcttc ctttttcaat
       61 attattgaag catttatcag ggttattgtc tcatgagcgg atacatattt gaatgtattt
      121 agaaaaataa acaaataggg gttccgcgca catttccccg aaaagtgcca cctgagtcta
      181 agaaaccatt attatcatga cattaaccta taaaaatagg cgtatcacga ggccctttcg
      241 tcttcaagaa ttcgtttaaa cggccggcca gatccaggtc gcagcggccg cGAATCACTC
      301 AGACTGATCG AAAAGTGCTT GCAAACCGAA AACAAAACAA AAAAAAAAAA AATAACAGAC
      361 ACAAACTGCC AAAGTGAGAA AACGTGCAGC AACGATCGCG AATCGCTGCA ATTAAAAAGT
      421 CGTCATAAAC CTAGTGCCCA TCCAACAAAA AAAAGCAAAA AGGTAAGTTC TGAGCGAGGG
      481 AGACAACATG AGATCAAAGT CAATTCACGG TTCTTGTTTT TGGGTCGCGG CCGTCGGCAA
      541 ATTTTACGAT CCCTTGTGCA CTACTTTTAT TTTTTACTGT TTCACGCGAA AAACTAACGG
      601 CCACATTTCC ATCTTTTCCT TATTTTTTTG CGTCCCGAGG CAGCGGGAAA AAAATCACAA
      661 TTTTCATAAG CCGAATTTTC TATTTTTTGT TTGACTCGGG AAAAATCGGC GTGAGTTTTT
      721 ATGGCCGAAC GTCAAGGTCT GGACTGCTGC TGCATTTTTT TAGGGAACAC TATTTTCGCA
      781 GCACTCGTAA TGACTTCGAA TAAAAAAGAA AATCTACCTG AGTTTTATGA CTGGACAGCG
      841 CGAAAAAAAT GAAAATGAAC GCATAGGGTT GCATAATCCG GCAGCTTAAG TTTTTTGGCC
      901 TGTTGTGATC ATAAAAAACG CCCATCCTGT CTAGTTTTTC CCAGTTTCCT GGTAAGTTTG
      961 CTTTGGTGTG AGTGCGAGTA CATAAGCCAA AGAGTTCGGC CAGTAGGCGA AACACAGAAA
     1021 CGCTTCTTGC CAGTCGAACC TCTCAGCCAG AAATCAGTCG TCAGCTAGTA GCCGAAGTGT
     1081 CAGTTACACA CATCGAGGAT TCCCAAggat cctacggtac ttattgccaa gaaagcacga
     1141 gcatcagccg tgcctccagg tcgaatcttc aaacgacgac gatcacgcgt cgctccagta
     1201 ttccagggtt catcagatcc tacggtactt attgccaaga aagcacgagc atcagccgtg
     1261 cctccaggtc gaatcttcaa acgacgacga tcacgcgtcg ctccagtatt ccagggttca
     1321 tcagatccta cggtacttat tgccaagaaa gcacgagcat cagccgtgcc tccaggtcga
     1381 atcttcaaac gacgacgatc acgcgtcgct ccagtattcc agggttcatc agatcctacg
     1441 gtacttattg ccaagaaagc acgagcatca gccgtgcctc caggtcgaat cttcaaacga
     1501 cgacgatcac gcgtcgctcc agtattccag ggttcatcag atcctacggt acttattgcc
     1561 aagaaagcac gagcatcagc cgtgcctcca ggtcgaatct tcaaacgacg acgatcacgc
     1621 gtcgctccag tattccaggg ttcatcagat cctacggtac ttattgccaa gaaagcacga
     1681 gcatcagccg tgcctccagg tcgaatcttc aaacgacgac gatcacgcgt cgctccagta
     1741 ttccagggtt catcagatcc tacggtactt attgccaaga aagcacgagc atcagccgtg
     1801 cctccaggtc gaatcttcaa acgacgacga tcacgcgtcg ctccagtatt ccagggttca
     1861 tcagatccta cggtacttat tgccaagaaa gcacgagcat cagccgtgcc tccaggtcga
     1921 atcttcaaac gacgacgatc acgcgtcgct ccagtattcc agggttcatc agatcctacg
     1981 gtacttattg ccaagaaagc acgagcatca gccgtgcctc caggtcgaat cttcaaacga
     2041 cgacgatcac gcgtcgctcc agtattccag ggttcatcag atcctacggt acttattgcc
     2101 aagaaagcac gagcatcagc cgtgcctcca ggtcgaatct tcaaacgacg acgatcacgc
     2161 gtcgctccag tattccaggg ttcatcagat cctacggtac ttattgccaa gaaagcacga
     2221 gcatcagccg tgcctccagg tcgaatcttc aaacgacgac gatcacgcgt cgctccagta
     2281 ttccagggtt catcagatcc tacggtactt attgccaaga aagcacgagc atcagccgtg
     2341 cctccaggtc gaatcttcaa acgacgacga tcacgcgtcg ctccagtatt ccagggttca
     2401 tcggatctat gttccaggac aaagggtgga ttcttgtgac cctgatcacc ttggtgacgc
     2461 cgtcttgggc tgcttacaaa cttcaggagc gatatagttg gagccagctg gactttgctt
     2521 tcccgaatac ccgactaaag gaccaagctc tggctagtgg agattatatt ccgcaaaatg
     2581 ctctacctgt tggagtcgaa cactttggca atcggttatt cgtcactgtt ccccgctggc
     2641 gtgatggtaa gtggaagtta aatatgaagc ccttggggag atcgtaaatg ggacattctt
     2701 acttagggca tcagagatat ctgattgagt ggttgacagt tttatatggc ttgtttgaca
     2761 tgatgtaaaa acacaaaatt catttagttt aggtattcaa ataagagctt gttatttatt
     2821 ttagaatttg gagaacattt ttttgtcttt ctacccttct tagaaaataa tattgttttg
     2881 tacaatttaa ttttaaacta gtacagacga aaaatgtatt tttttatttg tatgcctttt
     2941 caccattttg gcagaggaat aaatatgaca atatattttg agagcaccct catgtaaagg
     3001 ttttagcgtg gcgacctctc ataaatccgg ttggtacctg cgcgttattt taacatttta
     3061 aacaattaac cgttgtaaaa tcgaagccaa tagcatggca ttggctttat actgtattaa
     3121 attgtattat attaccatcc gaattgtaaa gacttcttca gggccgccac atagaaatgg
     3181 aaatccaatc acaaacaata acttatggca ttagctatta accgacgatt agctgtcagt
     3241 tcaacaaatg taagagtggc gaaatgttta aatgcgaagg cattgttctg tgactcacgt
     3301 tttattatta atcacacaaa tgattttgct tcaaaattat ttggcttaca caataatcaa
     3361 aatttttatg aaatagttga aacacaaaac taggaaattt taaaaagcaa tgaaactaaa
     3421 aaacccaatt gctaagatta tatgatgcgc atacaaatac ttcagtacgt ctaggaatgc
     3481 tttcgatgat tgattagttt ttatgcatgg cttacaattg gtatttacac agaaaaacac
     3541 ggcgatgtta ataaattttg tacatatgtt cttaagcagt ccgaaacacc caaacttctg
     3601 actaaactta aaaaaacacg ctcttcaagg atatcttaat gtcacttata atgtaatggt
     3661 attgtattat taagtatatc aaaatattct ggcccagcct tgaggtctct ttttaaaaag
     3721 atatcgactg actacctcca gtcaatgaaa taatagccca gaaggccgaa tcggcaaaaa
     3781 ataaacccca agttacggca aacaaaacat agtgaaagtt gtggcaaagt ggaacattta
     3841 aaggcatgct tcaatggcca tcgaagcaaa tcaattagtc aaagcaaatc ggtagtggca
     3901 acaacaggct acagaatacc tataagtgac agttatgggg tatgattaat tataaatatt
     3961 atcattgacc accaatgctg ggctcaattg gaaaaactat tctatgaaga tttgagtaaa
     4021 taaattttga tttaaaaaag cccatggtta tcgcgacaac tagctacggg acaagattac
     4081 tgtttaaaat caagtgtgaa atatcaaaat caaaatcgga ttccgatcgg gaagttgtat
     4141 ccgattctga aactaaaaca cagaattgcc aacattttcc gatatcgact cagctcacgt
     4201 atttcataca gattcattag gccaccagcc attgaataat ataccccagt caattgagct
     4261 actcgatagt tgatcaactt agcttttgtc aacgagtgaa cgcataaact actacatcaa
     4321 cgatatttgc ggcccattcc aagctaaaag ttcatcttaa ttacaaataa gattagaaaa
     4381 aatatctgaa tgaaaaaaat gttgagacat atttctttgg aaaaggagaa cctcaagaca
     4441 gtcgaaaaaa ttgtttacaa tgaaaatgtt gaaaatcatg aagcagataa atctgtcagt
     4501 tgcgaggttt taggactgaa agagcacatg tcaaaatata aatttgttca aatactttat
     4561 atttgactga attagattgt tattttaaaa gttatgaatt aaataaagat tgaaaggtgc
     4621 attatgctca aatgtatatt tatcgcaacc cccggttact ttgtaaagca aaaacgcctg
     4681 gtttgatttt taagaagatg ggtcggtaaa tcgataaaag ctatattttc tggtcgttgc
     4741 agtctcactc gcctgctata aaaacattaa aagttcccag aaacaataaa tgtctttaaa
     4801 ttcaattaac gaagaaataa agaaggaaaa gaactggagc ggaaatcggt cgaaatactg
     4861 ccaatggcca catatacatt taacagcgat atatggtata catattgata atgatgtcag
     4921 acgcaattgc ttcagacggc taatgacatc gcaaattgca cgcaacttgc aatagtgcca
     4981 attatgactg aagtacatat agccggggat cttttaacat aaacttccag tagatgtaca
     5041 agcagaaaaa agagccatta gcacggcagt taccattgct tatgattcct tgtgtccaaa
     5101 ataatgacaa ataggtatat aaataattaa atgccaaaca taagcgattc taatttacct
     5161 ttacatctgt atgcatttac atattatcca gaaaacagac agcgataact tgcaacattg
     5221 cttagtataa taatccaaag aaggaattta ggcagaaatt ccagttaatt aaatattcaa
     5281 aacaaacttt atttagtgcc tcaataatag tttggccctg ctaattctcc tattttattt
     5341 tttagggatt ccggccactc tgacctatat aaacatggac cgcagtttga cgggttcacc
     5401 ggagctaatt ccgtatccag attggcgctc aaatacagct ggagattgcg ccaacagtat
     5461 taccactgcc taccgcatta aagtggatga gtgtggtcgg ctgtgggttt tggacactgg
     5521 aaccgtgggc atcggcaata ccaccactaa tccgtgcccc tatgcggtaa atgtctttga
     5581 cttgaccacg gatacgcgaa ttcggagata cgagctacct ggcgtggaca caaatccaaa
     5641 tactttcata gctaacattg ccgtggatat aggcaaaaat tgcgatgatg catatgccta
     5701 ttttgccgat gaattgggat acggcttgat tgcttactcc tgggaactga acaagtcctg
     5761 gagattctcg gcacattcgt attttttccc cgatccattg aggggcgatt tcaatgtcgc
     5821 tggtattaac ttccaatggg gcgaggaggg tatatttggt atgtcccttt cgcccattcg
     5881 atcggatggt tatcgtaccc tgtactttag tccgttagca agtcatcgac aatttgccgt
     5941 atccacgagg attttgaggg atgaaaccag gacggaagat agctatcatg actttgttgc
     6001 cttagatgaa cggggtccaa actcccatac cacttcacgt gtgatgagcg atgatggaat
     6061 tgagctgttc aatttaatag atcaaaatgc agtgggttgc tggcactcat caatgccgta
     6121 ctcaccgcaa tttcatggca ttgtggatcg cgatgacgtt ggcttagttt ttccggccga
     6181 tgtgaaaatt gatgagaaca aaaacgtttg ggttctatcc gataggatgc ccgttttctt
     6241 gctgtctgac ttggattatt cagatactaa tttccgaatt tacacggctc ccttggccac
     6301 tttaattgag aatactgtgt gtgatttgag gaataacgcc tatgggccgc caaataccgt
     6361 ttcaatacca aaacaagccg ttttgccaat gggtccaccg ttatatacga aacaatatcg
     6421 tcctgtcttg ccacagaaac ctcagaccag ctgggcttcc tcgccgcctc ctccaagtcg
     6481 cacttatttg cccgccaatt caggcaatgt agtctccagt attagtgtct ctacaaattc
     6541 tgtgggtcct gcaggagtgg aggtgccaaa ggcctatatt ttcaaccagc acaacggcat
     6601 aaattacgag acaagtggtc cccatctatt tcccacccat caacccgccc aaccgggtgg
     6661 ccaggatggt gggttaaaaa cttatgtgaa tgcccgccaa tctgggtggt ggcatcatca
     6721 gcatcaaggt taaggcgcgc cactaagcgt cgcgccactt caacgctcga tgggagcgtc
     6781 attggtgggc ggggtaaccg tcgaaatcag tgtttacgct tccaatcgca acaaaaaatt
     6841 cactgcaaca ctgaaaagca tacgaaaacg atgaagattg tacgagaaac cataaagtat
     6901 tttatccaca aagacacgta tagcanaaaa gccaagttaa ctcggcgata agttgtgtac
     6961 acaagaataa aatcggccag attcagtgtt gtcagaaata agaaaacccc actatgtttt
     7021 tctttgcctt ttctttctcc cagcgatcat tcatttcgtg gtgaaagaac ggggtcattg
     7081 cacggagttt cgactgcggg aaagcagagc tgccgttcac ttcgtctata attagcgctt
     7141 tctattttcc ccgattcggg ccgctgctgc gcttttccgc ctgctgtttg tggcaagtgt
     7201 agcagcaggc tgtgcacgca gtgtggcatg cacttggctt tccaccgttg gtatcgattc
     7261 tctgggacga tgagtcattc ctttcggggc cacagcataa tcgttgccag ctcaccgaaa
     7321 tggtgacttc atttcttaac tgccgtcaag catgcgattg tacatacata catatttata
     7381 tatgtacata tttatgtgac tatggtaggt cgatataata gcaatcaacg caagcaaatg
     7441 tgtcagtcct gcttacagga acgattctat ttagtaattt tcgttgtata aagtaattat
     7501 gtatgtatgt aagccccata aatctgaaac aattaggcaa aaccatgcga agctctctag
     7561 agtcgacctg catctacaca aggaacaaac actggatgtc actttcagtt caaattgtaa
     7621 cgctaatcac tccgaacagg tcacaaaaaa ttaccttaaa aagtcataat attaaattag
     7681 aataaatata gctgtgaggg aaatatatac aaatatattg gagcaaataa attgtacata
     7741 caaatattta ttactaattt ctattgagac gaaatgaacc actcggaacc atttgagcga
     7801 accgaatcgc gcggaactaa cgacagtcgc tccaaggtcg tcgaacaaaa ggtgaatgtg
     7861 ttgcggagag cgggtgggag acagcgaaag agcaactacg aaacgtggtg tggtggaggt
     7921 gaattatgaa gagggcgcgc gatttgaaaa gtatgtatat aaaaaatata tcccggtgtt
     7981 ttatgtagcg ataaacgagt ttttgatgta aggtatgcag gtgtgtaagt cttttggtta
     8041 gaagacaaat ccaaagtcta cttgtgggga tgttcgaagg ggaaatactt gtattctata
     8101 ggtcatatct tgtttttatt ggcacaaata taattacatt agctttttga gggggcaata
     8161 aacagtaaac acgatggtaa taatggtaaa aaaaaaaaac aagcagttat ttcggatata
     8221 tgtcggctac tccttgcgtc gggcccgaag tcttagagcc agatatgcga gcacccggaa
     8281 gctcacgatg agaatggcca gacccacgta gtccagcggc agatcggcgg cggagaagtt
     8341 aagcgtctcc aggatgacct tgcccgaact ggggcacgtg gtgttcgacg atgtgcagct
     8401 aatttcgccc ggctccacgt ccgcccattg gttaatcagc agaccctcgt tggcgtaacg
     8461 gaaccatgag aggtacgaca accatttgag gtatactggc accgagcccg agttcaagaa
     8521 naagccgcca aagagcagga atggtatgat aaccggcgga cccacagaca gcgccatcga
     8581 ggtcgaggag ctggcgcagg atattagata tccgaaggac gttgacacat tggccaccag
     8641 agtgaccagc gccaggcagt tgaagaagtg cagcactccg gcccgcagtc cgatcatcgg
     8701 ataggcaatc gccgtgaaga ccagtggcac tgtgagaaaa agcggcaatt cggcaatcgt
     8761 tttgcccaga aagtatgtgt cacagcgata aagtcgactt cgggcctccc tcataaaaac
     8821 tggcagctct gaggtgaaca cctaaatcga atcgattcat tagaaagtta gtaaattatt
     8881 gaaatgcaaa tgtattctaa acatgactta catttatcgt ggcaaagacg ttttgaaagg
     8941 tcatgttggt caggaagagg aagatggctc cgttgatatt catcacaccc acttgcgtga
     9001 gttgttggcc caaaaagatg aggccaatca agatggcaac catctgcaaa ttaaaatgtt
     9061 actcgcatct cattaatatt cgcgagttaa atgaaattta tttatcttct gcaaaactat
     9121 aaactataca tctcattgaa aaaaactaag aagggtgtgg aatcaggcaa ttctatctaa
     9181 aatctagcga atttgtttcc aagaattgta agcgttatat catttgtttc cactggaacc
     9241 actcaccgtt gtctgaataa gtcgcacttt tacgaggagt ggttccttga gcaccgacag
     9301 ccaggatcgc cacaggaccg cccggaactg catgaaccag gtggccttgt aggtgtaccc
     9361 attctccggc tgctccagtg gcttctccag atttttggtg gccaacaact gctccatatc
     9421 ccgggctact ttgctaatgg caaaattgtc gcatatcttg gcgatccgat cacgggactc
     9481 gatctcccgt ccgggcacaa cggccaacac ctgtacgtaa aagtccgccg gattgtagtt
     9541 ggtaggacac tgggcaccca cgctggatag gagttgagat gttatgtaat actagatacc
     9601 cttaataaac acatcgaact cactaggaaa agaagtcgac ggcttcgctg ggagtgccca
     9661 agaaagctac cctgccctcg gccatcagaa ggatcttgtc aaagagctca aacagctcgg
     9721 aagacggctg atgaatggtc aggatgacgg tcttgccctt ctgcgacagc ttcttcagca
     9781 cctggacgac gctgtgggcg gtaaaggagt ccagtccgga ggtgggctca tcgcagatca
     9841 gaagcggcgg atcggttaga gcctcggagg cgaatgccag acgcttcctt tctccgccgg
     9901 acagaccttt caccctgccg ggcacaccga tgatcgtgtg ctgacatttg ctgagcgaaa
     9961 gctcctggat cacctgatcc acgcgggcca ctcgctgccg ataggtcaga tgtcgtggca
    10021 tccgcaccat ggcttggaaa atcaggtgtt ccctggccgt tagggagccg ataaagaggt
    10081 catcctgctg gacataggcg cacctggcct gcatctcctt ggcgtccaca ggttggccat
    10141 tgagcagtcg catcccggat ggcgatactt ggatgccctg cggcgatcga aaggcaaggg
    10201 cattcagcag ggtcgtcttt ccggcaccgg aactgcccat cacggccaaa agttcgcccg
    10261 gataggccac gccgcaaact gagtttcaaa ttggtaattg gaccctttat taagatttca
    10321 cacagatcag ccgactgcga atagaaactc accgttcttg agcaaatgtt tcctgggcgc
    10381 cggtatgtgt cgctcgttgc agaatagtcc gcgtgtccgg ttgaccagct gccgccatcc
    10441 ggagcccggc tgattgaccg ccccaaagat gtccatattg tgccaggcat aggtgaggtt
    10501 ctcggctagt tggccgctcc ctgaaccgga gtcctccggc ggactgggtg gccggagcgt
    10561 gccgtagttt ttggcctgcc cgaagccctg gttaatgcag ctctgcgaag ccgctccgct
    10621 gtcaccctgc aatgataggg gatctcaaat atcaactaca agcgttatgc tcatctaacc
    10681 ccgaacaaaa agtaccccga agtatcctac gaagtaggtt tatactttta tttatttttt
    10741 gtgcatctag gatcagctta aaatatctgg ttgttatatt ttttgtaaaa aagaatatag
    10801 tcgaaaatga atgcctttag atgtcttgat catgatatga tctcaaaaat tgtcttatat
    10861 agcgagaaca gctaccagaa taatctgttt cgtgtcacta tttgtttgtg caattgcggt
    10921 ttgggatttt tgtgggtcgc agttctcacg ccgcagacaa tttgatgttg caatcgcagt
    10981 tcctatagat caagtgaact taagatgtat gcacatgtac tactcacatt gttcagatgc
    11041 tcggcagatg ggtgtttgct gcctccgcga attaatagct cctgatcctc ttggcccatt
    11101 gccgggattt ttcacacttt cccctgctta cccacccaaa accaatcacc accccaatca
    11161 ctcaaaaaac aaacaaaaat aagaagcgag aggagttttg gcacagcact ttgtgtttaa
    11221 ttgatggcgt aaaccgcttg gagcttcgtc acgaaaccgc tgacaaaatg caactgaagg
    11281 cggacattga cgctacgtaa cgctacaaac ggtggcgaaa gagatagcgg acgcagcggc
    11341 gaaagagacg gcgatatttc tgtggacaga gaaggaggca aacagcgctg actttgagtg
    11401 gaatgtcatt ttgagtgaga ggtaatcgaa agaacctggt acatcaaata cccttggatc
    11461 gaagtaaatt taaaactgat cagataagtt caatgatatc cagtgcagta aaaaaaaaaa
    11521 atgttttttt tatctacttt ccgcaaaaat gggttttatt aacttacata catactaggc
    11581 gcgcccatat gttcggcttg tcgacatgcc cgccgtgacc gtcgagaacc cgctgacgct
    11641 gccccgcgta tccgcacccg ccgacgccgt cgcacgtccc gtgctcaccg tgaccaccgc
    11701 gcccagcggt ttcgagggcg agggcttccc ggtgcgccgc gcgttcgccg ggatcaacta
    11761 ccgccacctc gacccgttca tcatgatgga ccagatgggt gaggtggagt acgcgcccgg
    11821 ggagcccaag ggcacgccct ggcacccgca ccgcggcttc gagaccgtga cctacatcgt
    11881 cgacggtaac atgtgagcaa aaggccagca aaaggccagg aaccgtaaaa aggccgcgtt
    11941 gctggcgttt ttccataggc tccgcccccc tgacgagcat cacaaaaatc gacgctcaag
    12001 tcagaggtgg cgaaacccga caggactata aagataccag gcgtttcccc ctggaagctc
    12061 cctcgtgcgc tctcctgttc cgaccctgcc gcttaccgga tacctgtccg cctttctccn
    12121 ttcgggaagc gtggcgcttt ctcatagctc acgctgtagg tatctcagtt cggtgtaggt
    12181 cgttcgctcc aagctgggct gtgtgcacga accccccgtt cagcccgacc gctgcgcctt
    12241 atccggtaac tatcgtcttg agtccaaccc ggtaagacac gacttatcgc cactggcagc
    12301 agccactggt aacaggatta gcagagcgag gtatgtaggc ggtgctacag agttcttgaa
    12361 gtggtggcct aactacggct acactagaag aacagtattt ggtatctgcg ctctgctgaa
    12421 gccagttacc ttcggaaaaa gagttggtag ctcttgatcc ggcaaacaaa ccaccgctgg
    12481 tagcggtggt ttttttgttt gcaagcagca gattacgcgc agaaaaaaag gatctcaaga
    12541 agatcctttg atcttttcta cggggtctga cgctcagtgg aacgaaaact cacgttaagg
    12601 gattttggtc atgagattat caaaaaggat cttcacctag atccttttaa attaaaaatg
    12661 aagttttaaa tcaatctaaa gtatatatga gtaaacttgg tctgacagtt accaatgctt
    12721 aatcagtgag gcacctatct cagcgatctg tctatttcgt tcatccatag ttgcctgact
    12781 ccccgtcgtg tagataacta cgatacggga gggcttacca tctggcccca gtgctgcaat
    12841 gataccgcga gacccacgct caccggctcc agatttatca gcaataaacc agccagccgg
    12901 aagggccgag cgcagaagtg gtcctgcaac tttatccgcc tccatccagt ctattaattg
    12961 ttgccgggaa gctagagtaa gtagttcgcc agttaatagt ttgcgcaacg ttgttgccat
    13021 tgctacaggc atcgtggtgt cacgctcgtc gtttggtatg gcttcattca gctccggttc
    13081 ccaacgatca aggcgagtta catgatcccc catgttgtgc aaaaaagcgg ttagctcctt
    13141 cggtcctccg atcgttgtca gaagtaagtt ggccgcagtg ttatcactca tggttatggc
    13201 agcactgcat aattctctta ctgtcatgcc atccgtaaga tgcttttctg tgactggtga
    13261 gtactcaacc aagtcattct gagaatagtg tatgcggcga ccgagttgct cttgcccggc
    13321 gtcaatacgg gataataccg cgccacatag cagaacttta aaagtgctca tcattggaaa
    13381 acgttcttcg gggcgaaaac tctcaaggat cttaccgctg ttgagatcca gttcgatgta
    13441 acccactcgt gcacccaact gatcttcagc atcttttact ttcaccagcg tttctgggtg
    13501 agcaaaaaca ggaaggcaaa atgccg
//
